# Supplementary material for: New luminescent organoboron esters based on damnacanthal: one-pot multicomponent synthesis, optical behavior, cytotoxicity, and selectivity studies against MDA-MBA-231 breast cancer cells
Source: Royal Society of Chemistry journal article supplement (doi:10.1039/d2nj03959a), 2022-01-01
Supplement: d2nj03959a1.pdf [file d2nj03959a1.pdf]

## Electronical supporting information for

New luminescent organoboron esters based on damnacanthal: One-Pot multicomponent synthesis, optical behavior, cytotoxicity, and selectivity studies against MDA-MBA-231 breast cancer cells

María C. García-López,<sup>a</sup> Angel.D. Herrera-España,<sup>b</sup> José R. Estupiñan-Jiménez,<sup>c</sup> Vianey González-Villasana,<sup>c</sup> David. Caceres-Castillo,<sup>d</sup> E. Bojórquez-Quintal,<sup>e</sup> P. Elizondo,<sup>f</sup> Rosa M. Jiménez-Barrera,<sup>\*g</sup> Rodrigo Chan-Navarro<sup>\*f</sup>

<sup>a</sup>CONACyT-Universidad Autónoma de Nuevo León, Facultad de Ciencias Químicas, Cd. Universitaria, Av. Universidad s/n. C. P. 66451, Nuevo León, México.

<sup>b</sup>División de Ciencias de la Salud, Universidad Autónoma del Estado de Quintana Roo. Av. Erick Paolo Martínez S/N. Esquina Av. 4 de marzo, Col. Magisterial, C.P. 77039, Chetumal, Quintana Roo, México.

<sup>c</sup>Departamento de Biología Celular y Genética, Facultad de Ciencias Biológicas, Universidad Autónoma de Nuevo León, San Nicolás de los Garza, México.

<sup>d</sup>Facultad de Química, Universidad Autónoma de Yucatán, C. 43 No. 613, Col. Inalámbrica, C.P. 97069, Mérida, Yucatán, México.

<sup>e</sup>CONACyT-Laboratorio de Análisis y Diagnóstico del Patrimonio, El Colegio de Michoacán, Cerro de Nahuatzen 85, Jardines del Cerro Grande, 59370, La Piedad, Michoacán, México.

<sup>f</sup>Universidad Autónoma de Nuevo León, Facultad de Ciencias Químicas, Cd. Universitaria, Av. Universidad s/n. C. P. 66451, Nuevo León, México.

<sup>g</sup>CONACYT-Centro de Investigación en Química Aplicada, Blvd. Enrique Reyna Herosillo 140, C. P. 25294, Saltillo, México.

\*Corresponding author: Tel +52(81)83294000, ext. 6293; Fax: 52 (81)83760570.

E-mail: [rosa.jimenez@ciqa.edu.mx](mailto:rosa.jimenez@ciqa.edu.mx) (Rosa M. Jiménez-Barrera)  
[rodrigo.chanvrr@uanl.edu.mx](mailto:rodrigo.chanvrr@uanl.edu.mx) (Rodrigo Chan-Navarro)

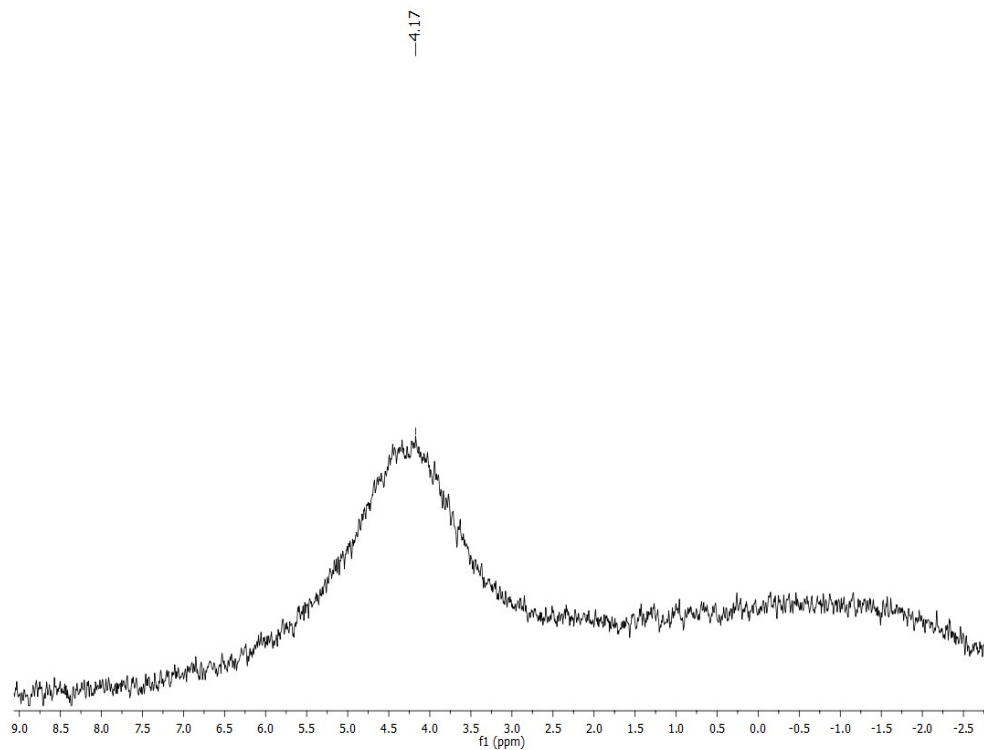

**Fig. S1.**  $^{11}\text{B}$  NMR spectrum of organoboron ester derivative **4a** in  $(\text{CD}_3)_2\text{SO}$  at 128 MHz.

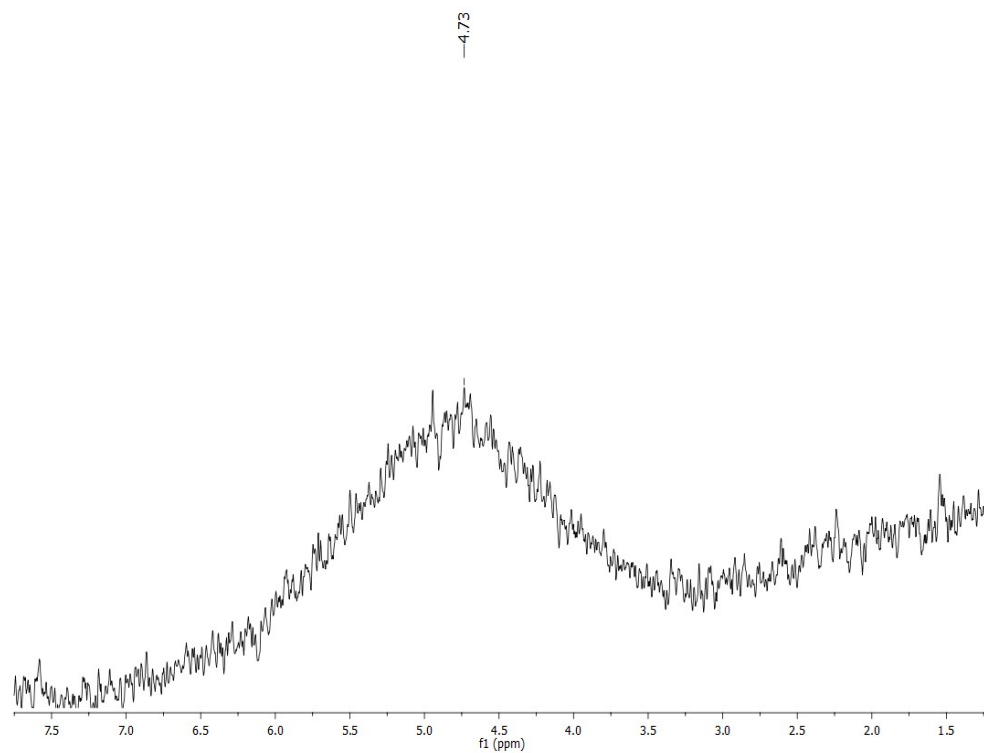

**Fig. S2.**  $^{11}\text{B}$  NMR spectrum of organoboron ester derivative **4b** in  $\text{CDCl}_3$  at 128 MHz.

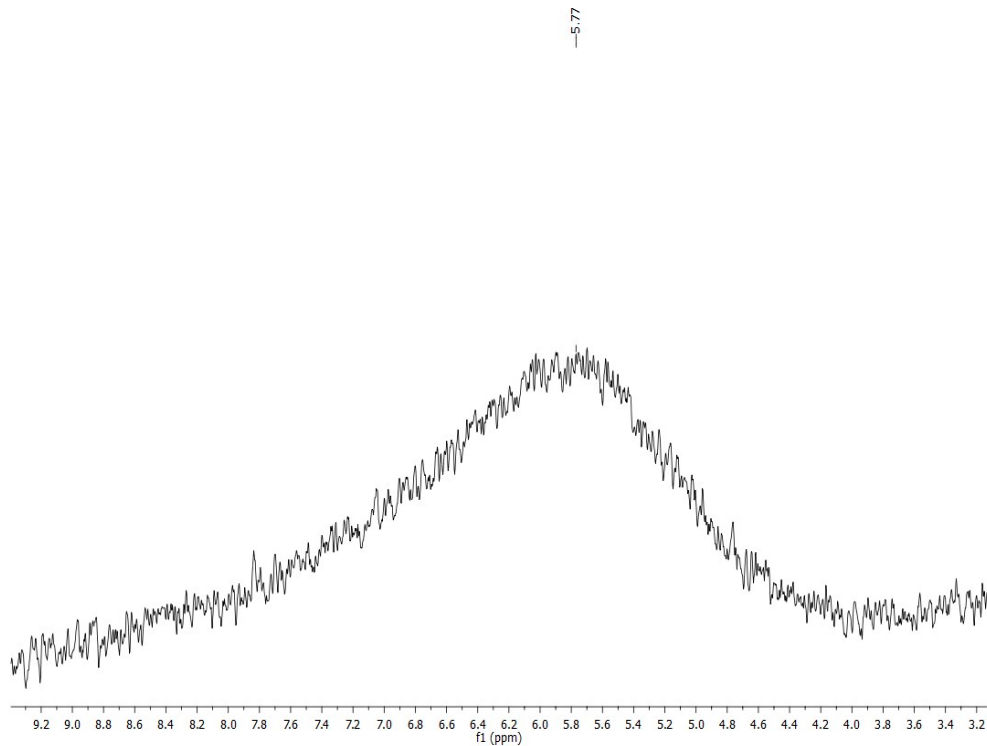

**Fig. S3.**  $^{11}\text{B}$  NMR spectrum of organoboron ester derivative **4c** in  $\text{CDCl}_3$  at 128 MHz.

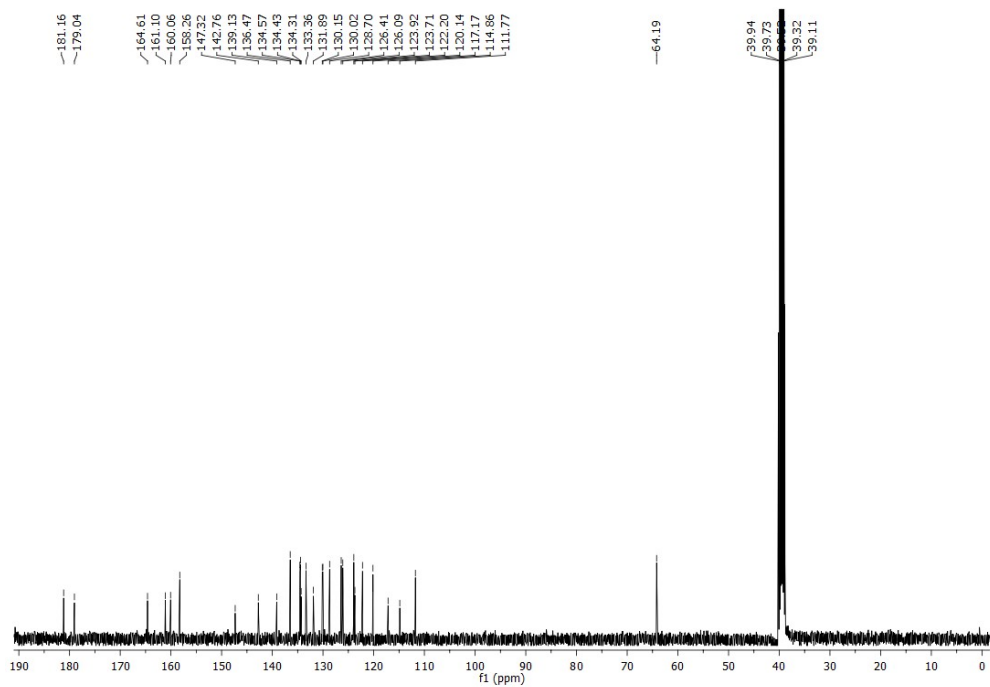

**Fig. S4.**  $^{13}\text{C}$  NMR spectrum of organoboron ester derivative **4a** in  $(\text{CD}_3)_2\text{SO}$  at 100.14 MHz.

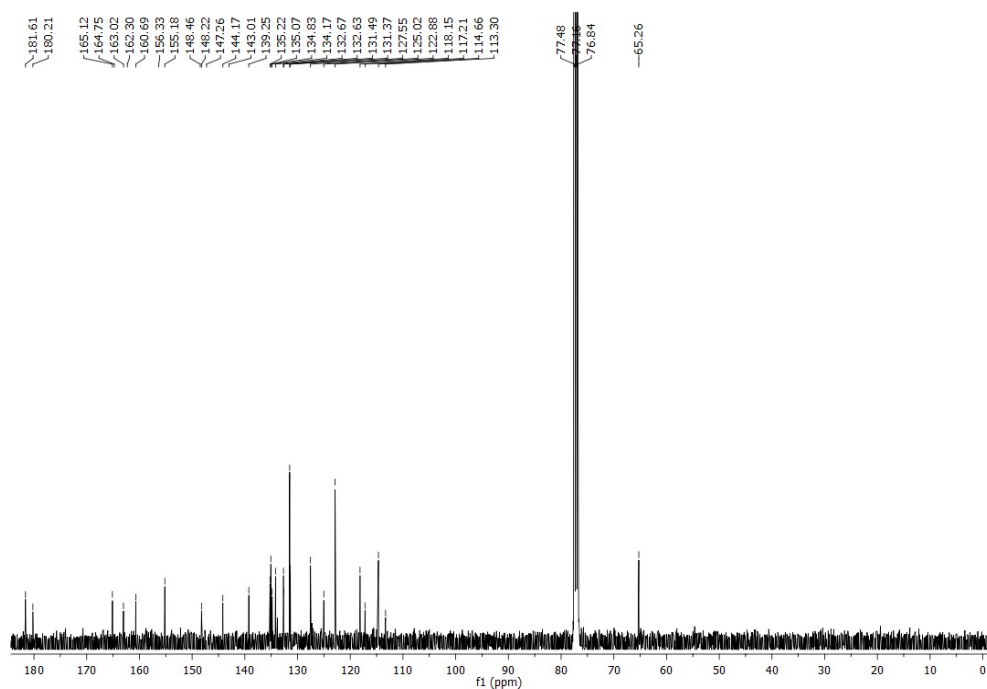

Fig. S5.  $^{13}\text{C}$  NMR spectrum of organoboron ester derivative **4b** in  $\text{CDCl}_3$  at 100.14 MHz.

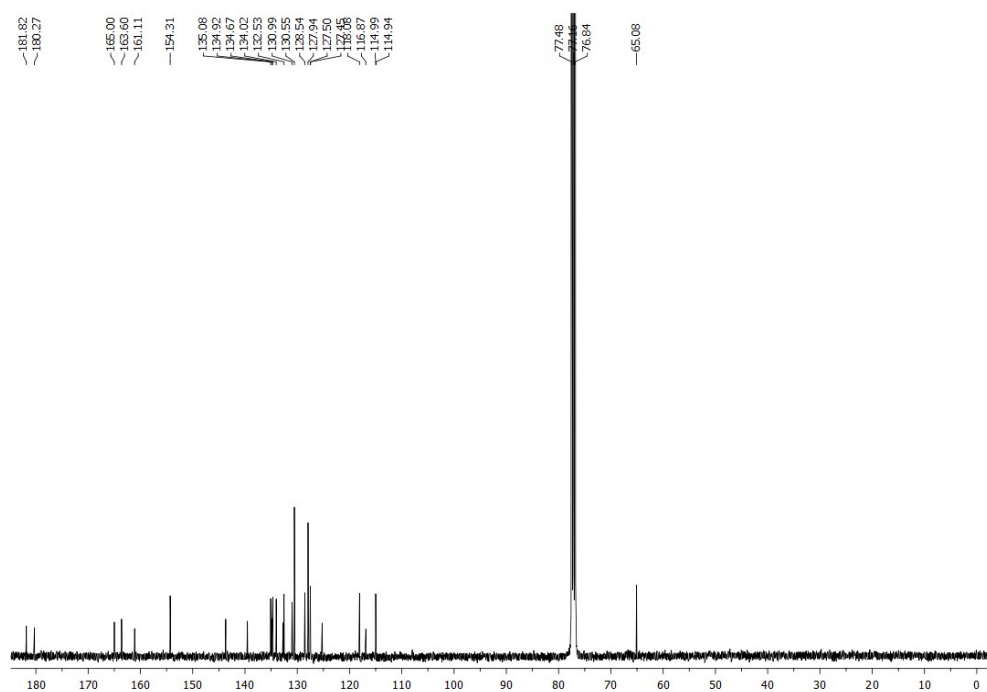

Fig. S6.  $^{13}\text{C}$  NMR spectrum of organoboron ester derivative **4c** in  $\text{CDCl}_3$  at 100.14 MHz.

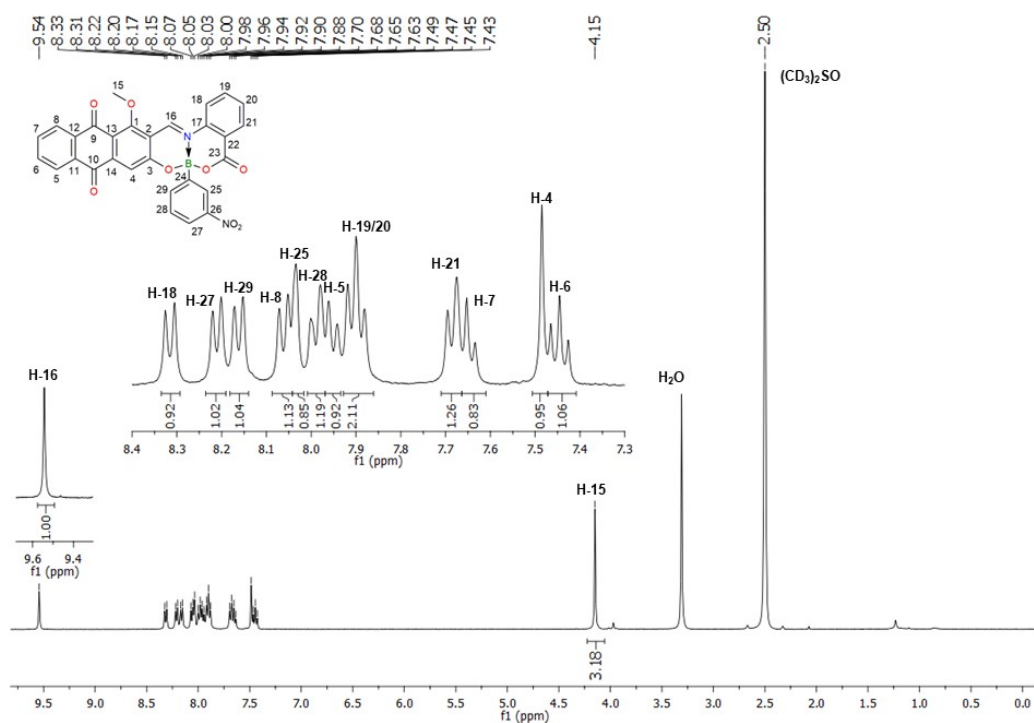

**Fig. S7.**  $^1\text{H}$  NMR  $(\text{CD}_3)_2\text{SO}$  spectrum of compound **4a** at 400.14 MHz.

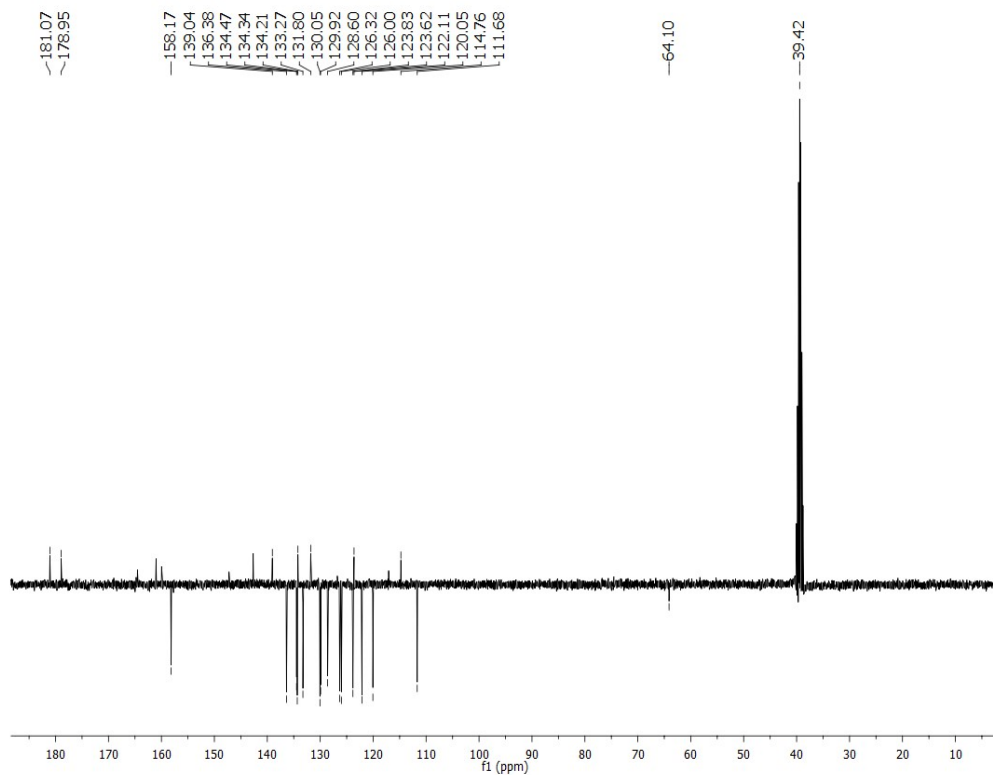

**Fig. S8.** DEPT 135 spectrum of organoboron ester derivative **4a** in  $(\text{CD}_3)_2\text{SO}$  at 100.14 MHz.

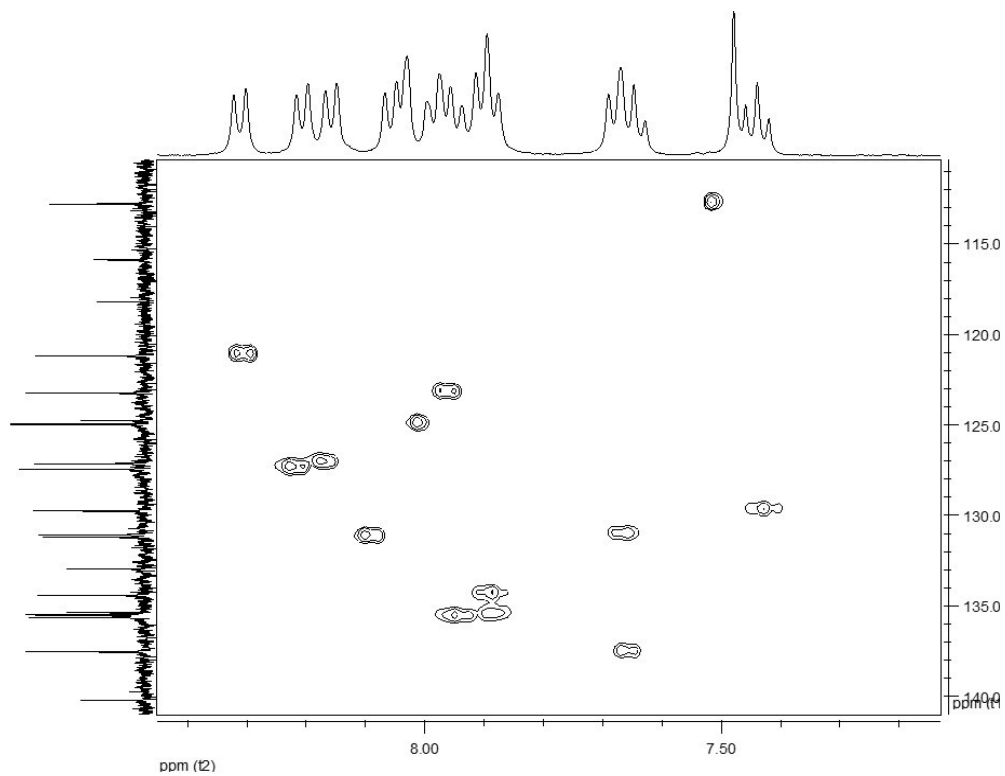

**Fig. S9.** HETCOR spectrum of organoboron ester derivative **4a** in  $(\text{CD}_3)_2\text{SO}$  at 100.14 MHz.

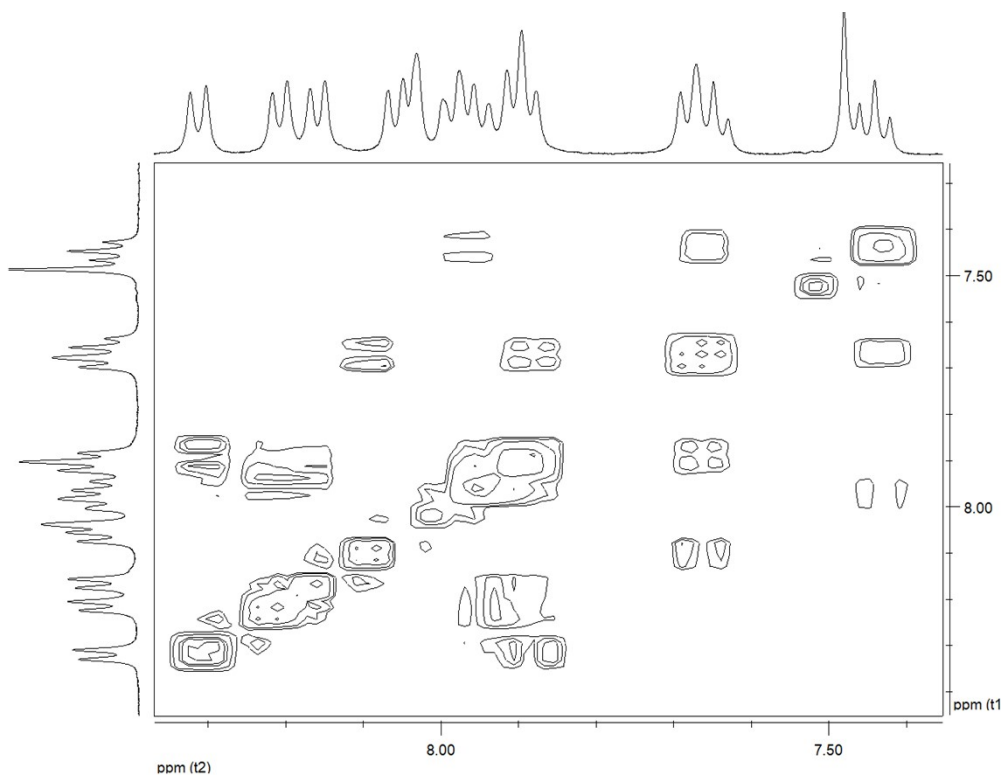

**Fig. S10.** COSY spectrum of organoboron ester derivative **4a** in  $(\text{CD}_3)_2\text{SO}$  at 100.14 MHz.

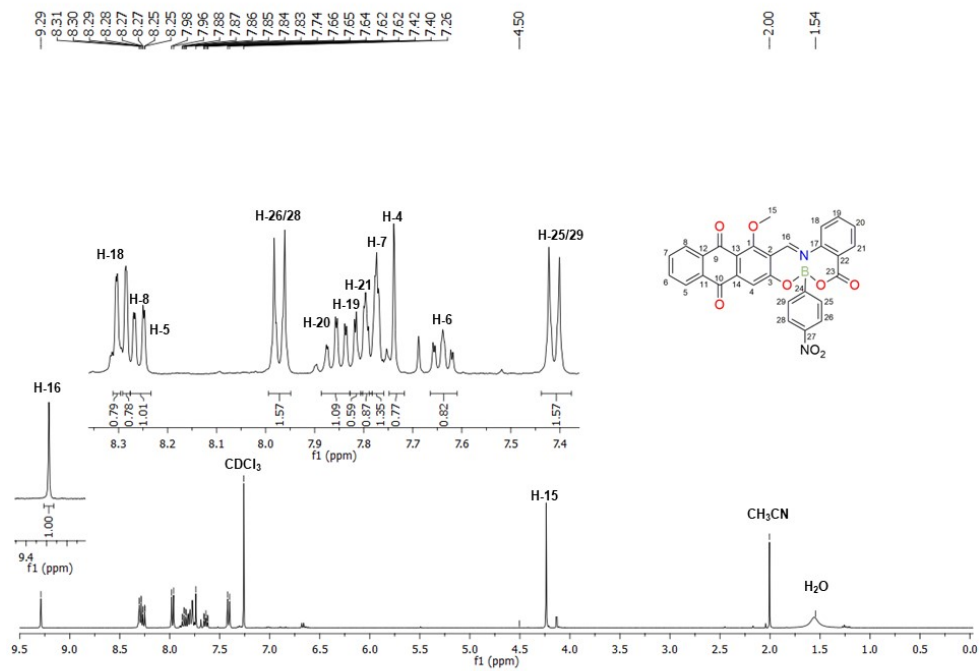

Fig. S11. <sup>1</sup>H NMR spectrum of organoboron ester derivative **4b** in CDCl<sub>3</sub> at 400.16 MHz

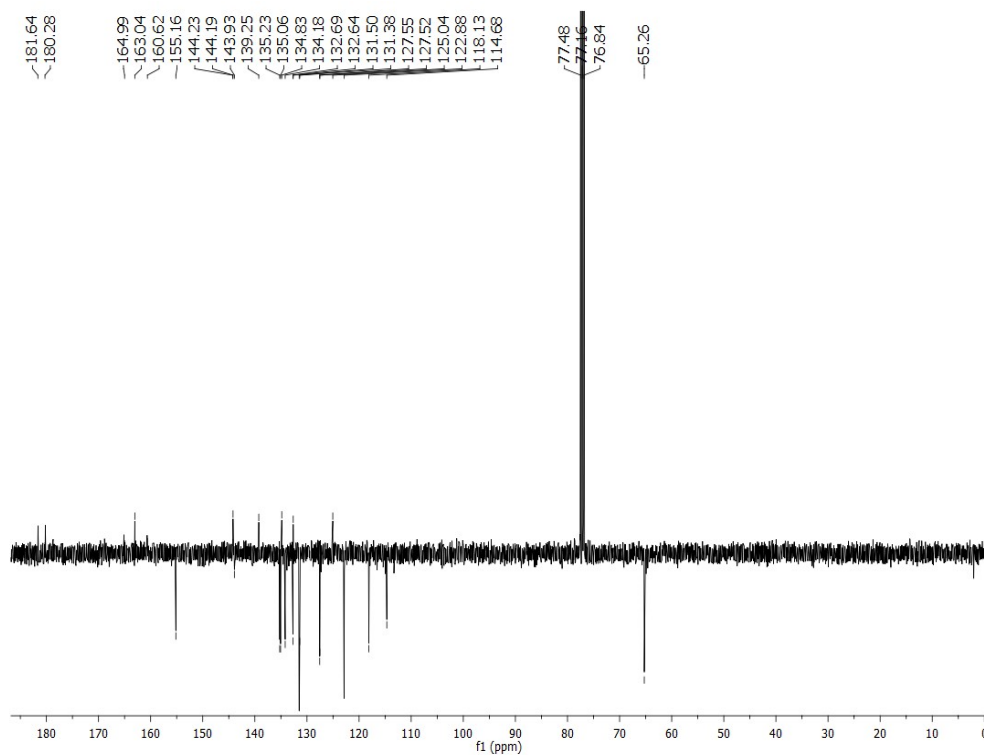

Fig. S12. DEPT 135 spectrum of organoboron ester derivative **4b** in CDCl<sub>3</sub> at 100.14 MHz.

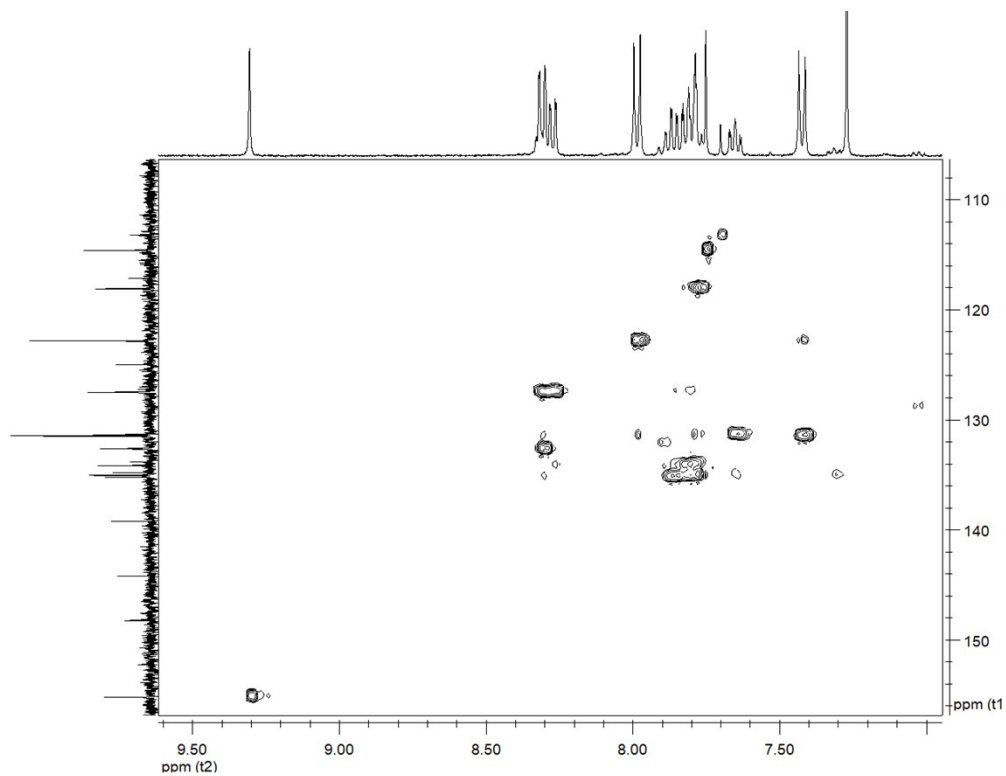

**Fig. S13.** HETCOR spectrum of organoboron ester derivative **4b** in  $\text{CDCl}_3$  at 100.14 MHz.

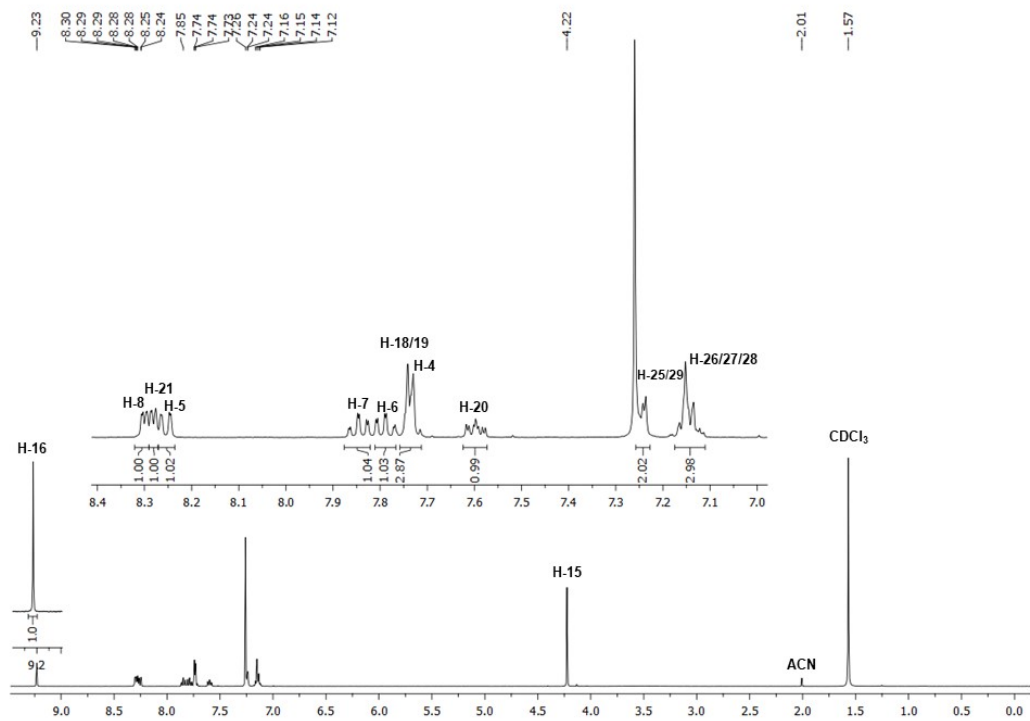

**Fig. S14.**  $^1\text{H}$  NMR ( $\text{CD}_3)_2\text{SO}$ ) spectrum of organoboron ester **4c** at 400.14 MHz.



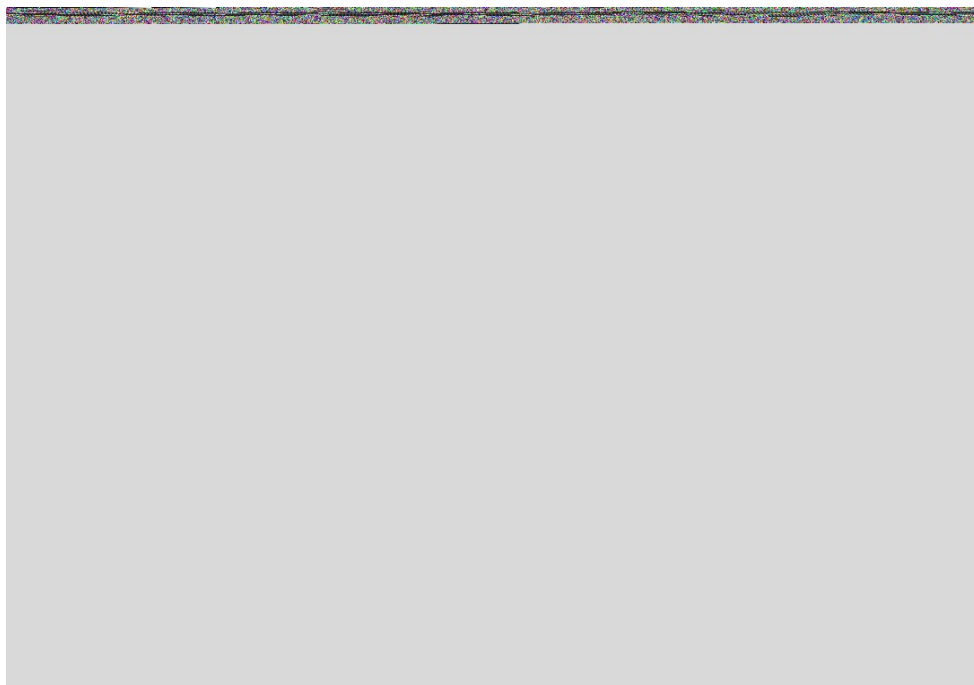

**Fig. S15.** <sup>13</sup>C NMR spectrum of organoboron ester derivative **4c** in (CD<sub>3</sub>)<sub>2</sub>SO at 100.14 MHz.

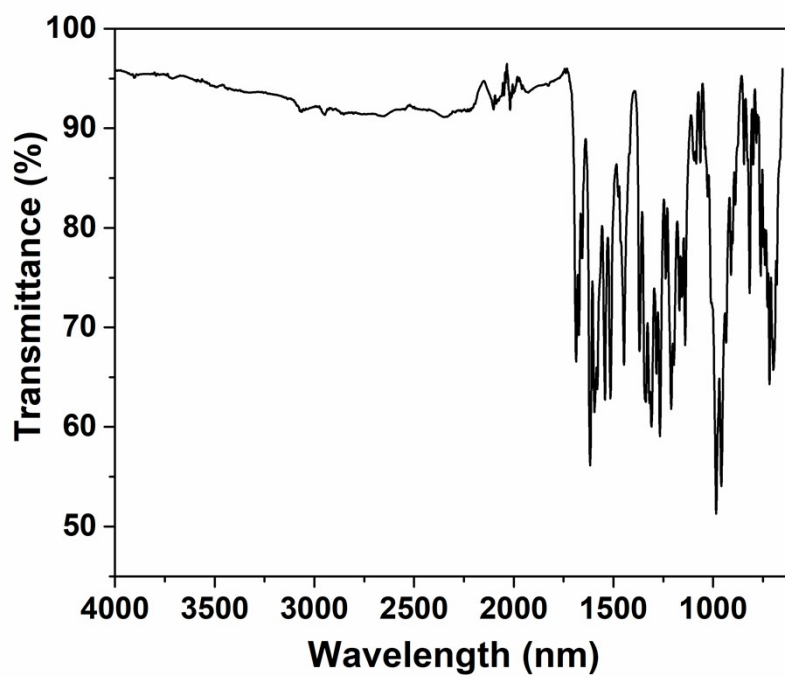

**Fig. S16.** IR-ATR spectrum of organoboron ester derivative **4a**.

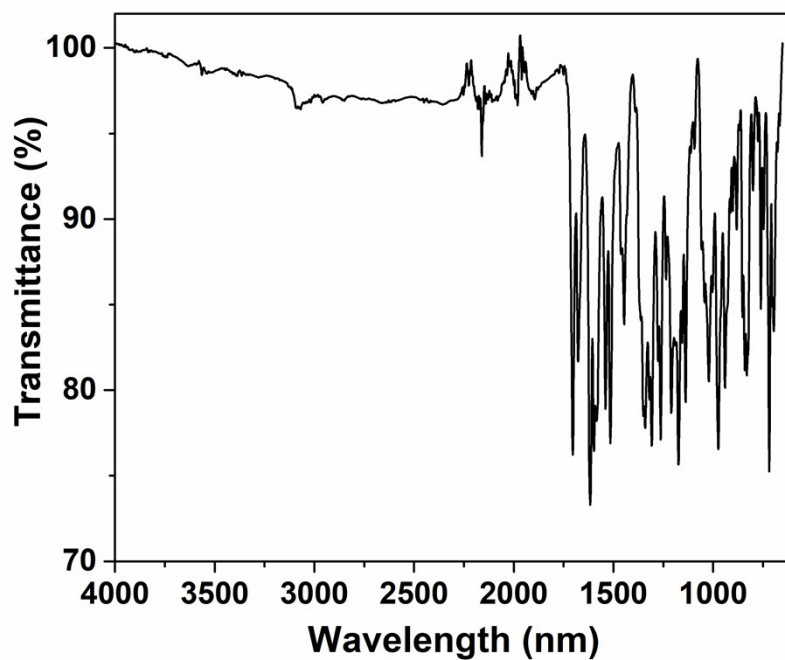

Fig. S17. IR-ATR spectrum of organoboron ester derivative **4b**.

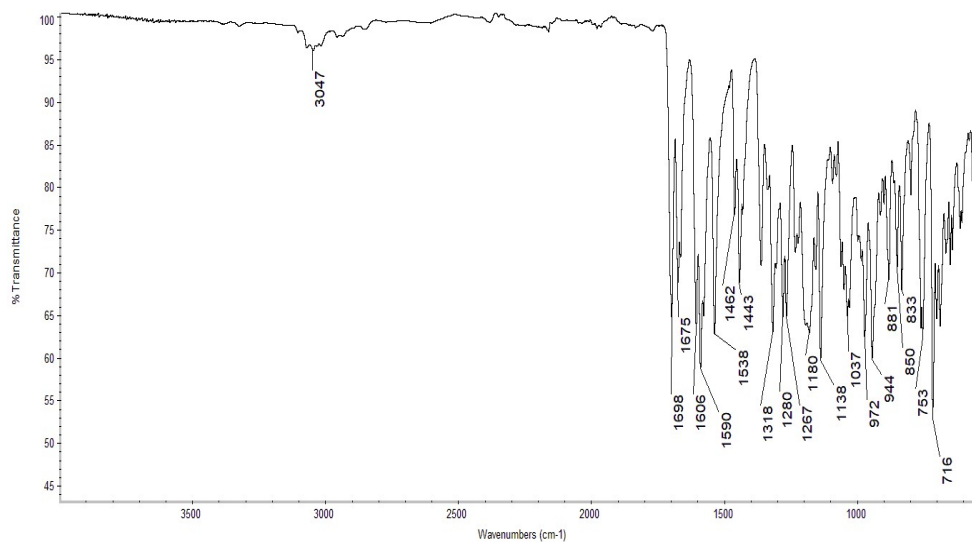

Fig. S18. IR-ATR spectrum of organoboron ester derivative **4c**.

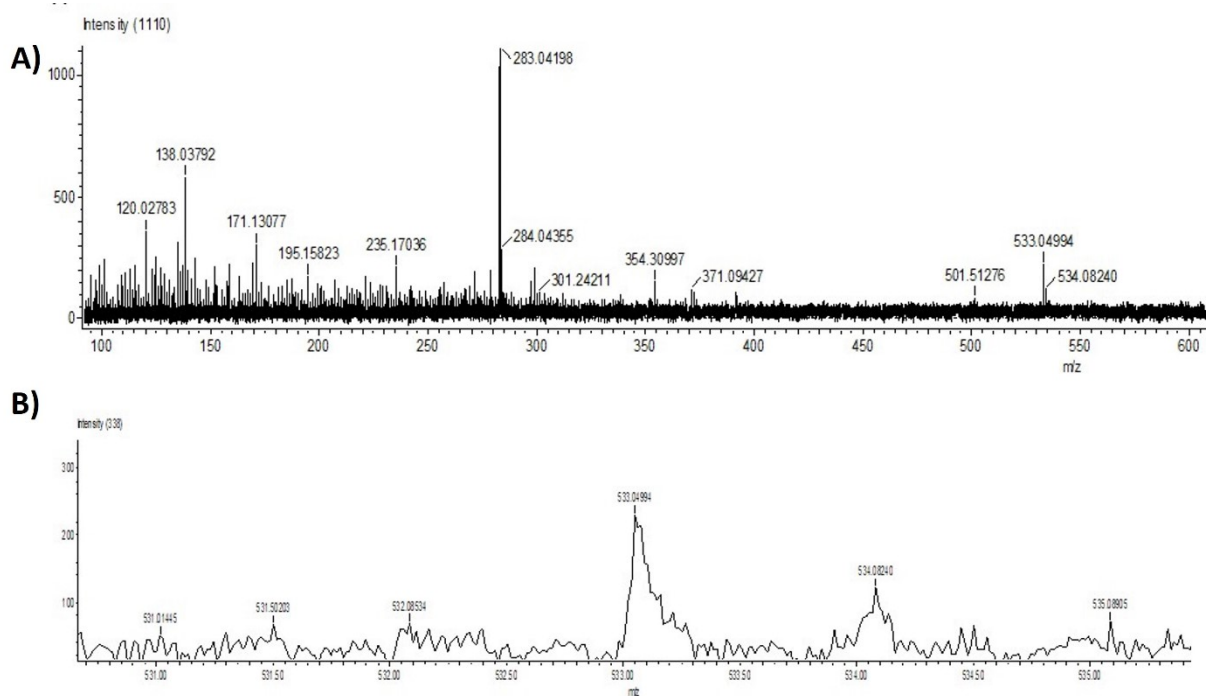

**Fig. S.19.** DART-HRMS spectrum of organoboron ester **4a** and B) Isotopic pattern of compound **4a**

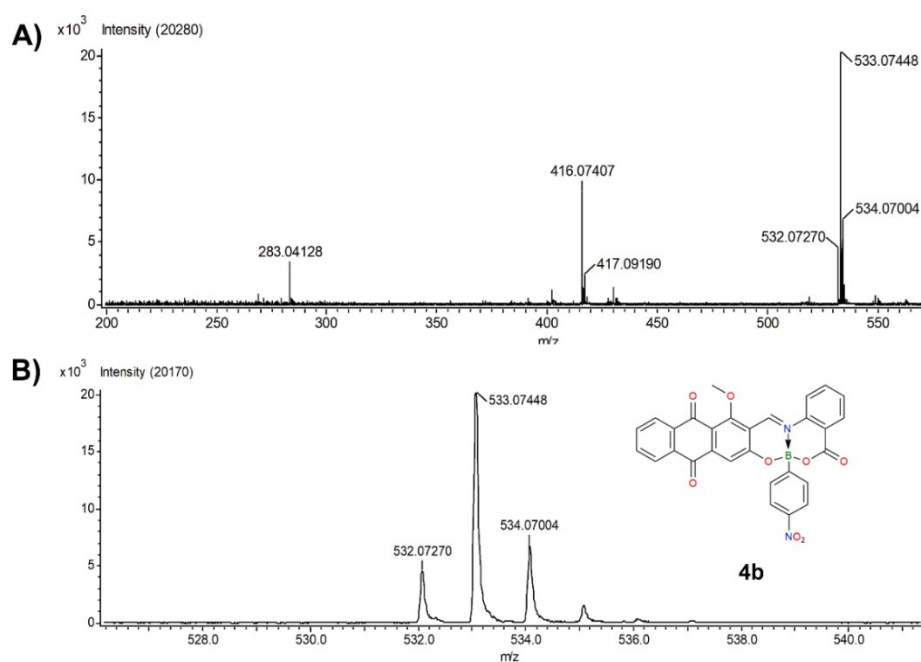

**Fig. S.20.** DART-HRMS spectrum of organoboron ester **4b** and B) Isotopic pattern of compound **4b**.

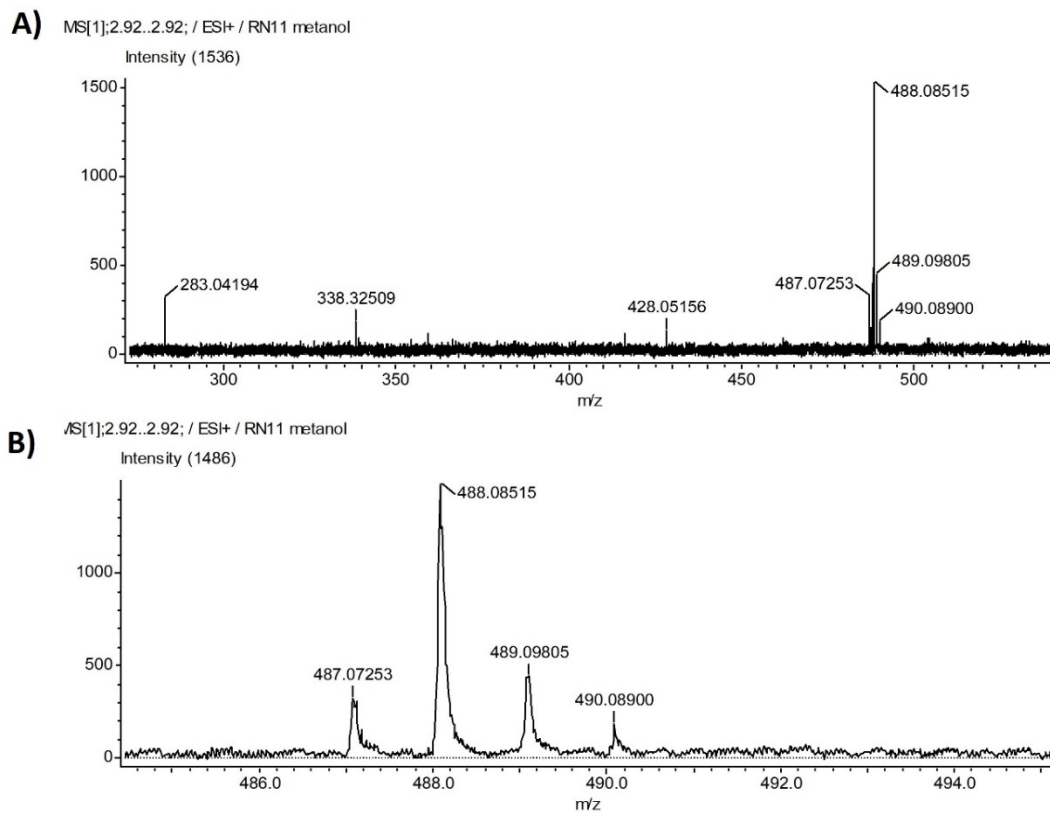

**Fig. S.21.** DART-HRMS spectrum of organoboron ester **4c** and B) Isotopic pattern of compound **4c**.

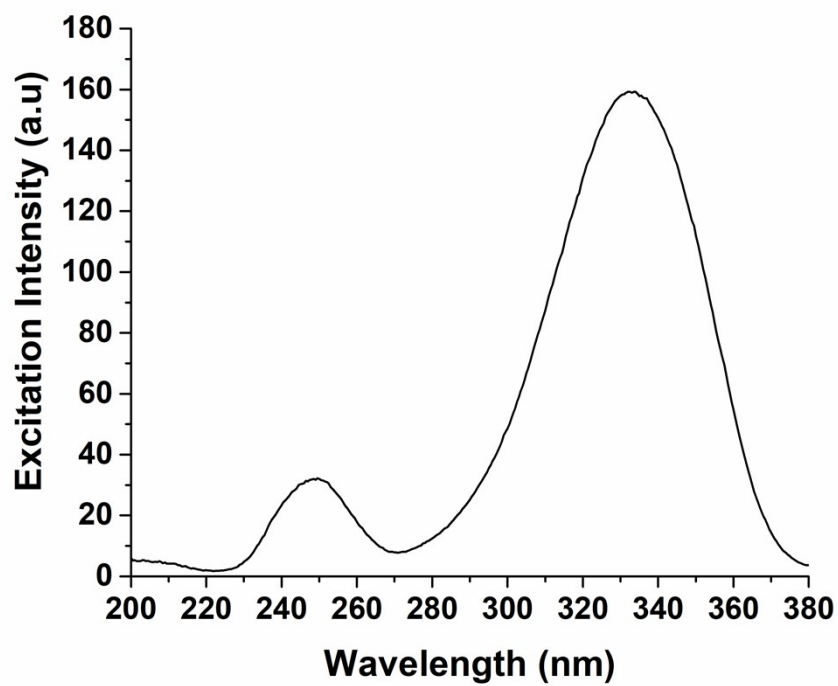

Fig. S22. Excitation spectrum of compound **4a** excited at 256 nm.

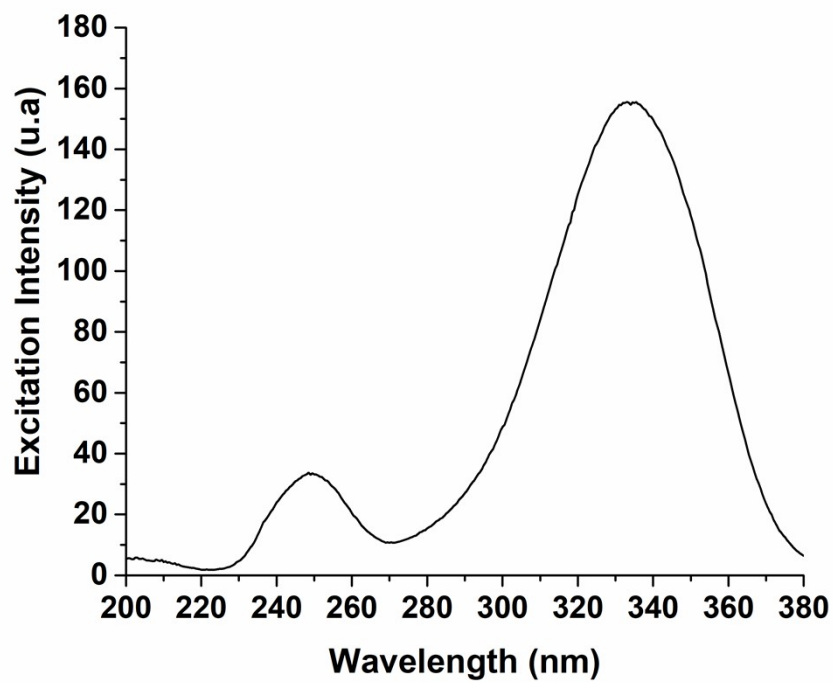

Fig. S23. Excitation spectrum of compound **4b** excited at 257 nm.

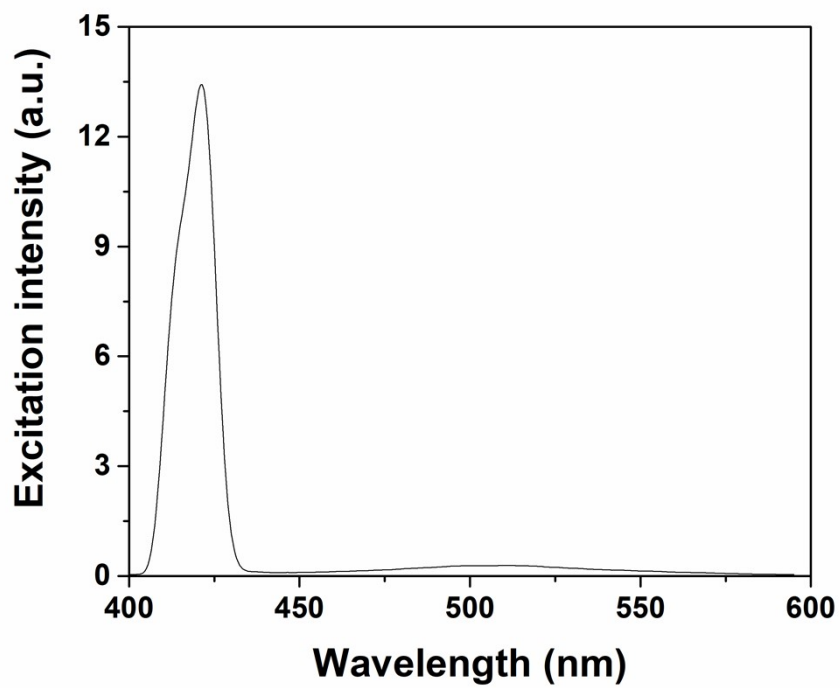

Fig. S24. Excitation spectrum of compound **4a** excited at 415 nm.

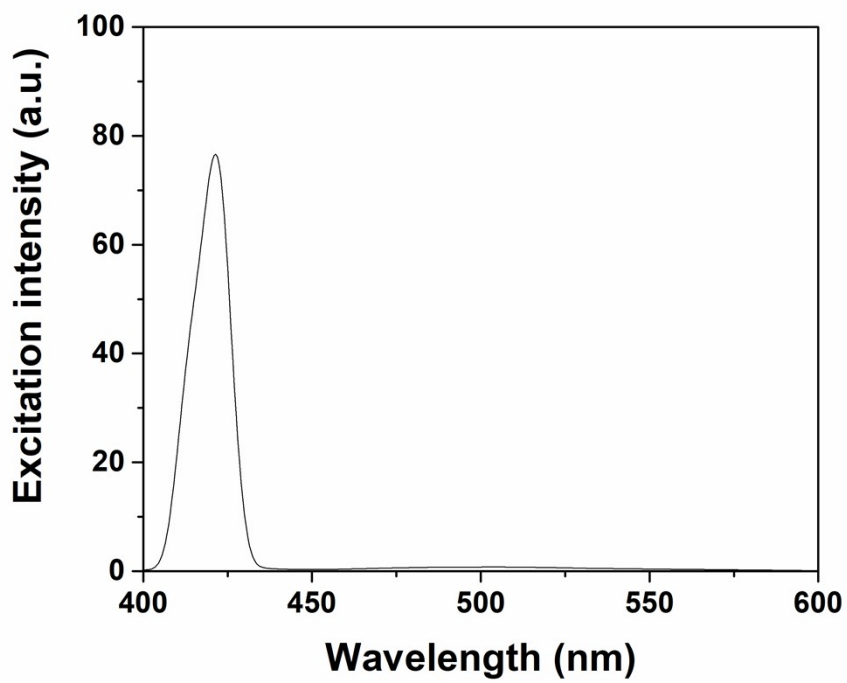

Fig. S25. Excitation spectrum of compound **4b** excited at 416 nm.

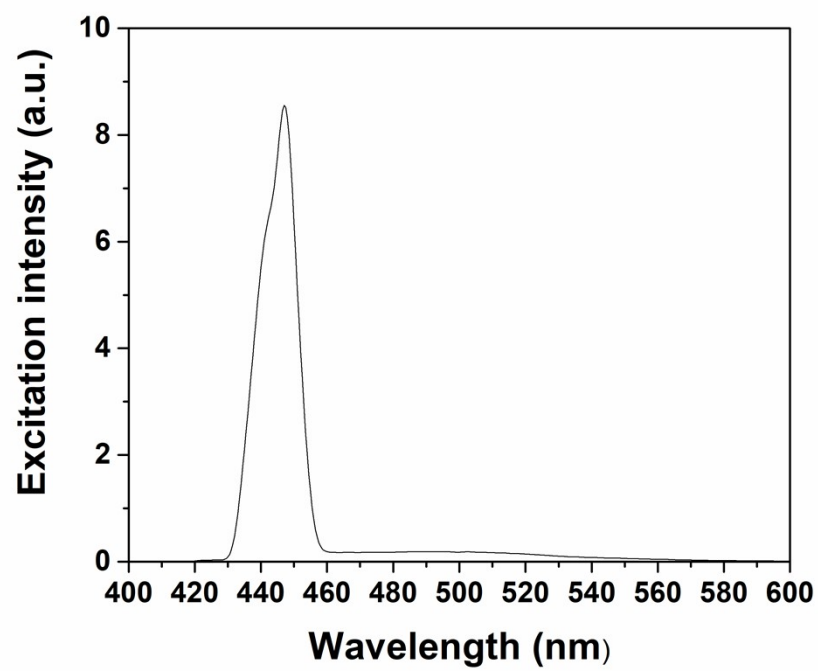

Fig. S26. Excitation spectrum of compound **4c** excited at 440 nm.
